# Supplementary material for: Linking Bacterial Endophytic Communities to Essential Oils: Clues from Lavandula angustifolia Mill
Source: Hindawi journal article supplement (doi:10.1155/2014/650905), 2014-01-01
Supplement: f1 [file 650905.f1.pdf]

**Supplementary Figure 1.** Bayesian dendrogram showing the relationships among the 16S rDNA sequences of 47 isolates belonging to the genus *Bacillus* and those of reference type strains. Posterior probability values are indicated at the node. Nodes are collapsed at 70% probability. LT = bacteria isolated from the rhizosphere, LR = bacteria isolated from the roots, LS = bacteria isolated from the stem.

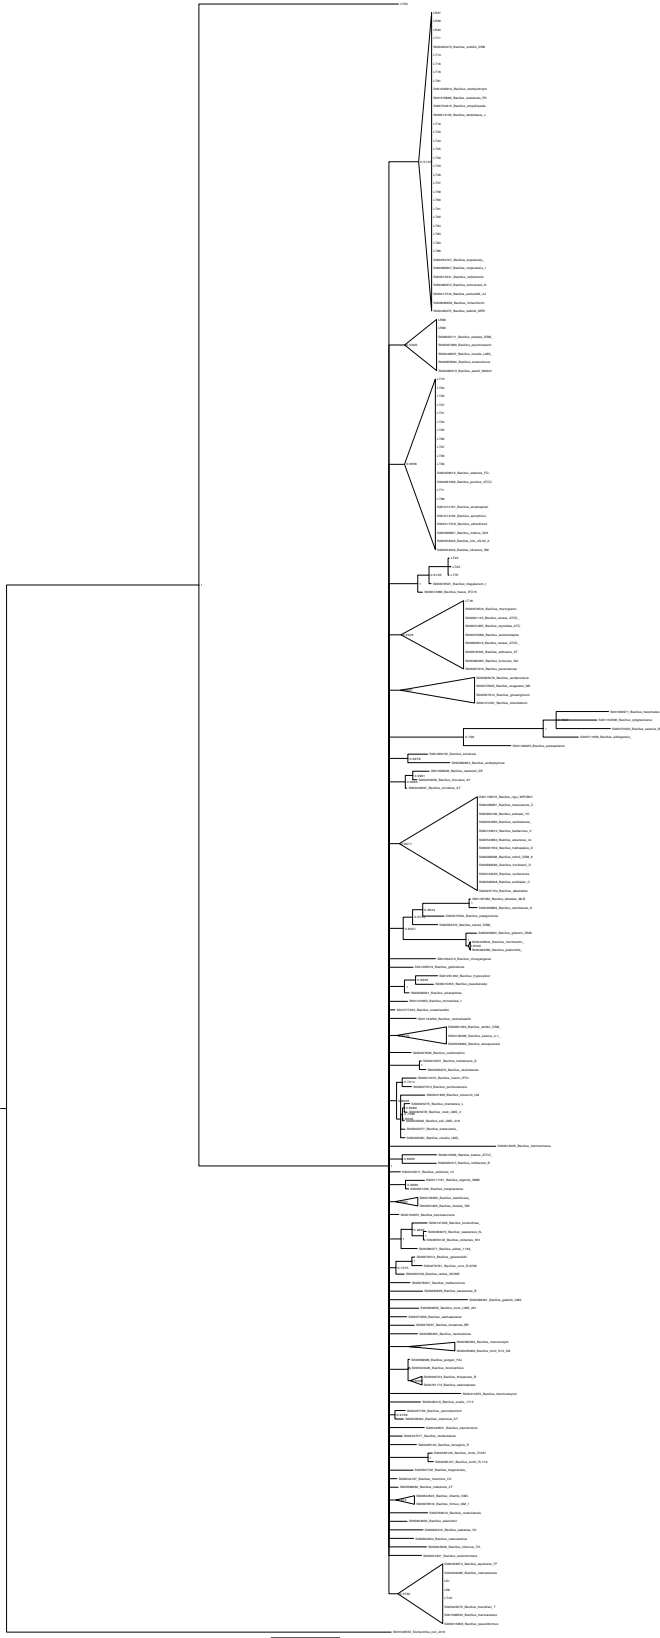

**Supplementary Figure 2.** Bayesian dendrogram showing the relationships among the 16S rDNA sequences of isolates belonging to the genus *Pseudomonas* and those of reference type strains. Posterior probability values are indicated at the node. Nodes are collapsed at 70% probability. LT= bacteria isolated from the rhizosphere, LR = bacteria isolated from the roots, LS = bacteria isolated from the stem, LL = bacteria isolated from the leaves.

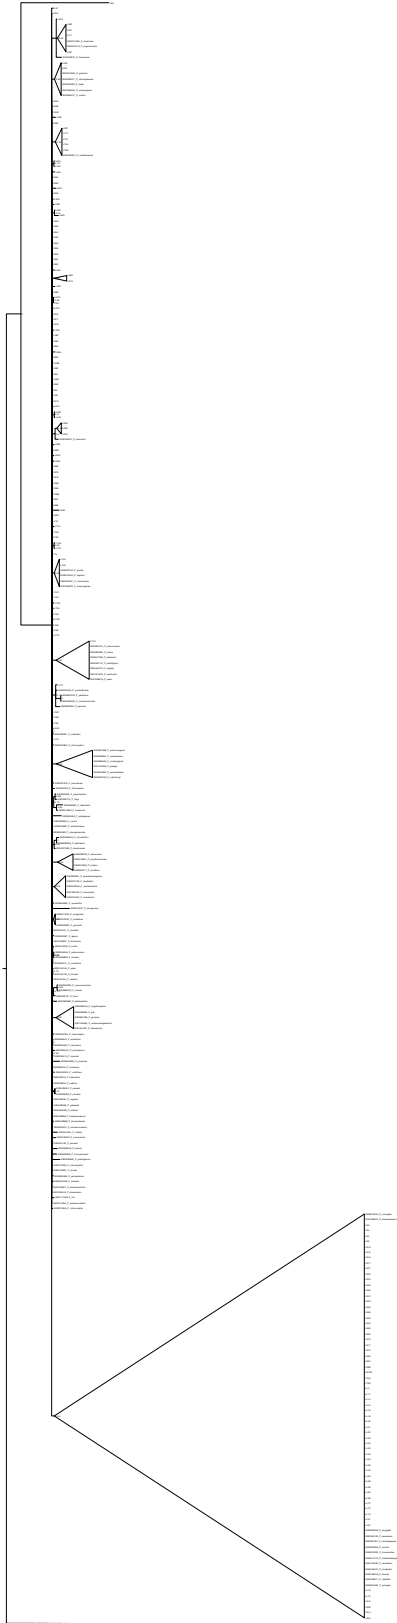

**Supplementary Figure 3.** Maximum parsimony dendrogram showing the relationships among the 16S rDNA sequences of 37 isolates belonging to the genus *Stenotrophomonas* and those of reference type strains. Bootstrap values are indicated at the node. LL= bacteria isolated from the leaves, LR = bacteria isolated from the roots (see Material and Methods and Suppl. Table 4 for details).

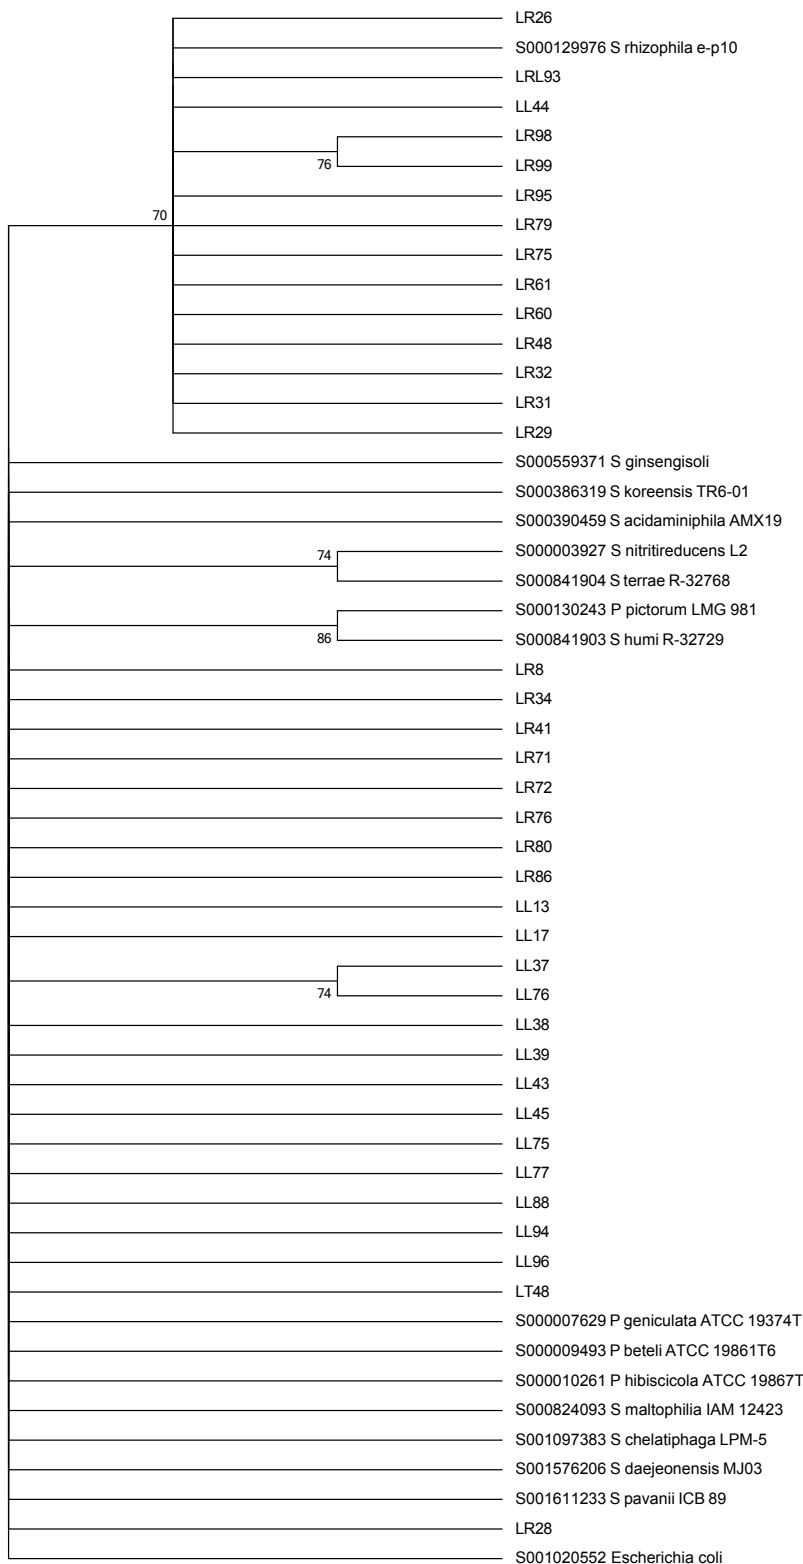

**Supplementary Figure 4.** Maximum parsimony dendrogram showing the relationships among the 16S rDNA sequences of 46 isolates belonging to the genus *Rhizobium* and those of reference type strains. Bootstrap values are indicated at each node. Nodes are collapsed at 70% probability. LT= bacteria isolated from the rhizosphere, LR = bacteria isolated from the roots (see Material and Methods and Suppl. Table 4 for details).

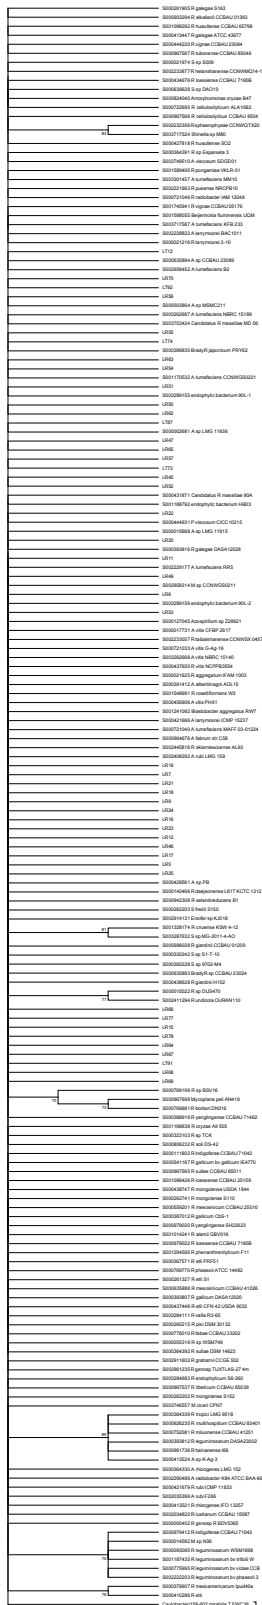

**Supplementary Figure 5.** Maximum parsimony dendrogram showing the relationships among the 16S rDNA sequences of 25 isolates belonging to the genus *Pantoea* and those of reference type strains. Bootstrap values are indicated at the node. Nodes are collapsed at 70% probability. LS = bacteria isolated from the stem, LL = bacteria isolated from the leaves (see Material and Methods and Suppl. Table 4 for details).

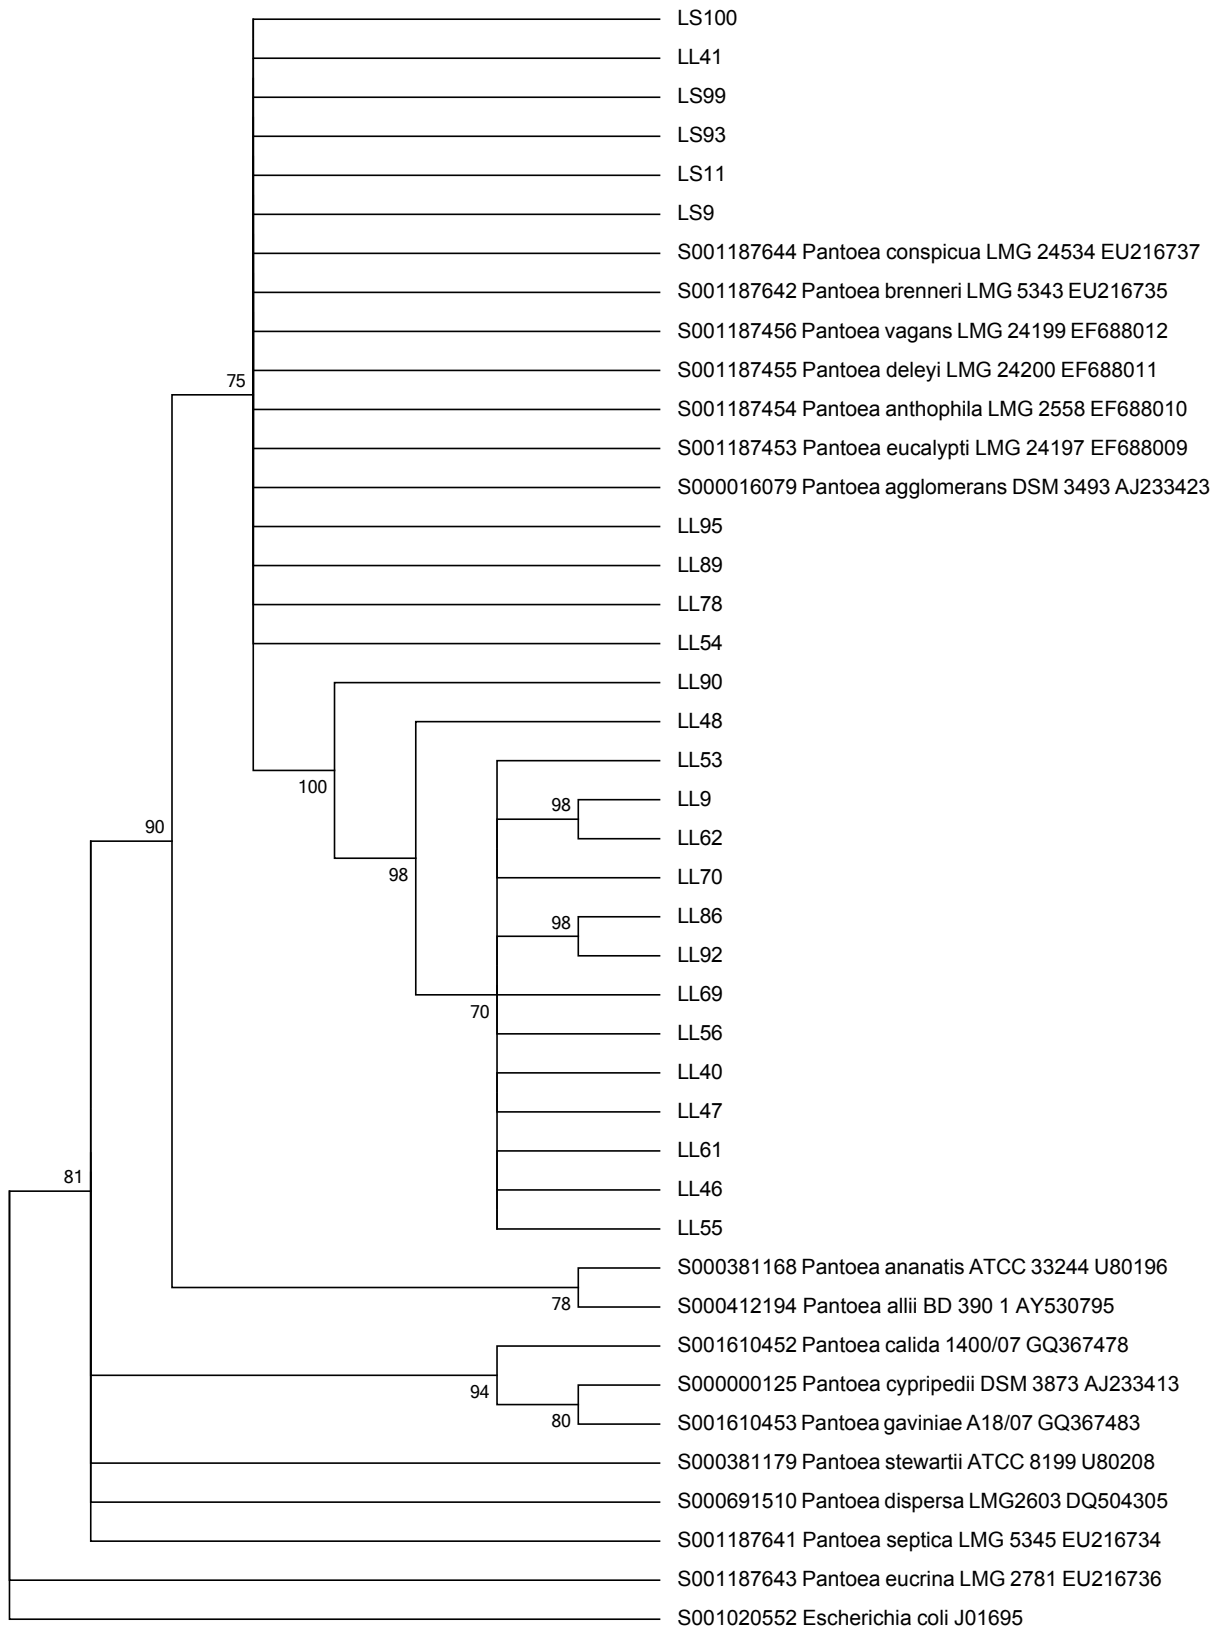

**Supplementary Figure 6.** Maximum parsimony dendrogram showing the relationships among the 16S rDNA sequences of 30 isolates belonging to the genus *Microbacterium* and those of reference type strains. Bootstrap values are indicated at the node. Nodes are collapsed at 70% probability. LT = bacteria isolated from the rhizosphere, LS = bacteria isolated from the stem, LL = bacteria isolated from the leaves (see Material and Methods and Suppl. Table 4 for details).

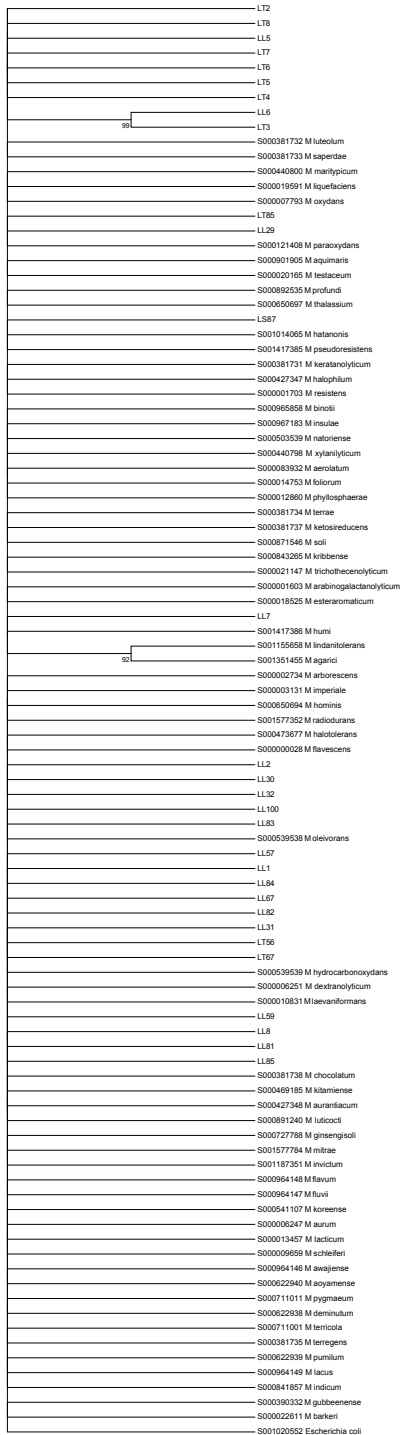

**Supplementary Figure 7.** Maximum parsimony dendrogram showing the relationships among the 16S rDNA sequences of 47 isolates belonging to the genus *Bacillus* and those of reference type strains. Bootstrap values are indicated at the node. Nodes are collapsed at 70% probability. LT = bacteria isolated from the rhizosphere, LR = bacteria isolated from the roots, LS = bacteria isolated from the stem (see Material and Methods and Suppl. Table 4 for details).

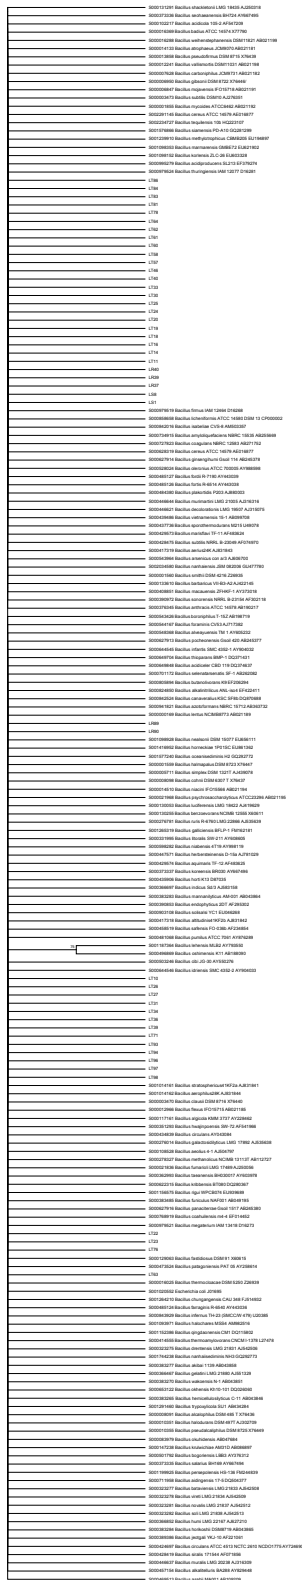

**Supplementary Figure 8.** Maximum parsimony dendrogram showing the relationships among the 16S rDNA sequences of isolates belonging to the genus *Pseudomonas* and those of reference type strains. Bootstrap values are indicated at the node. Nodes are collapsed at 70% probability. LT= bacteria isolated from the rhizosphere, LR = bacteria isolated from the roots, LS = bacteria isolated from the stem, LL = bacteria isolated from the leaves (see Material and Methods and Suppl. Table 4 for details).

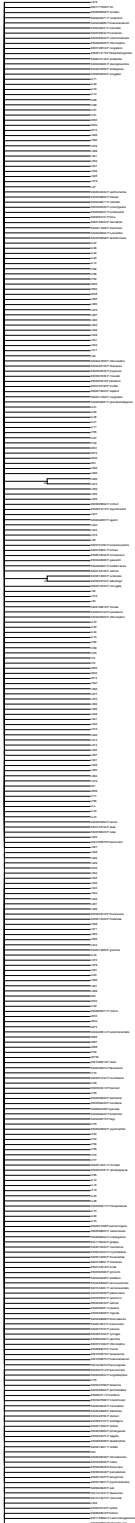



**Supplementary Figure 9.** NJ dendrogram showing the relationships among the 16S rDNA sequences of 37 isolates belonging to the genus *Stenotrophomonas* and those of reference type strains. Scale bars represent the Kimura-2 distance. Bootstrap values are indicated at the node. Nodes are collapsed at 70% probability. LL= bacteria isolated from the leaves, LR = bacteria isolated from the roots.

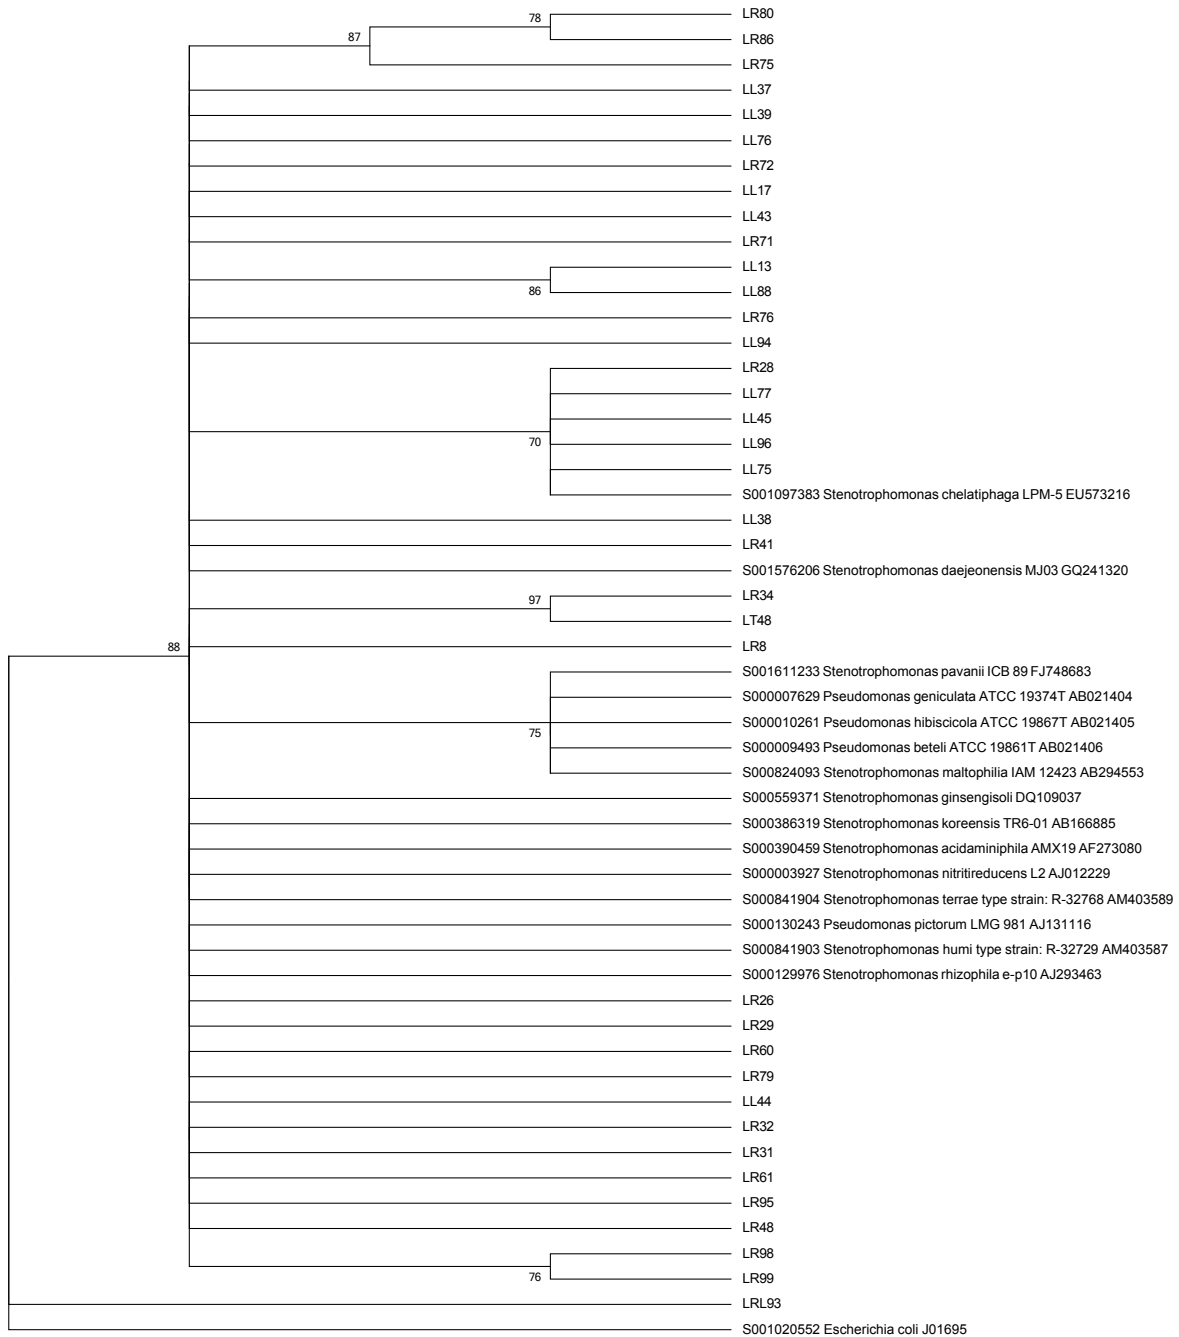

**Supplementary Figure 10.** NJ dendrogram showing the relationships among the 16S rDNA sequences of 46 isolates belonging to the genus *Rhizobium* and those of reference type strains. Scale bars represent the Kimura-2 distance. Bootstrap values are indicated at each node. Nodes are collapsed at 70% probability. LT= bacteria isolated from the rhizosphere, LR = bacteria isolated from the roots.

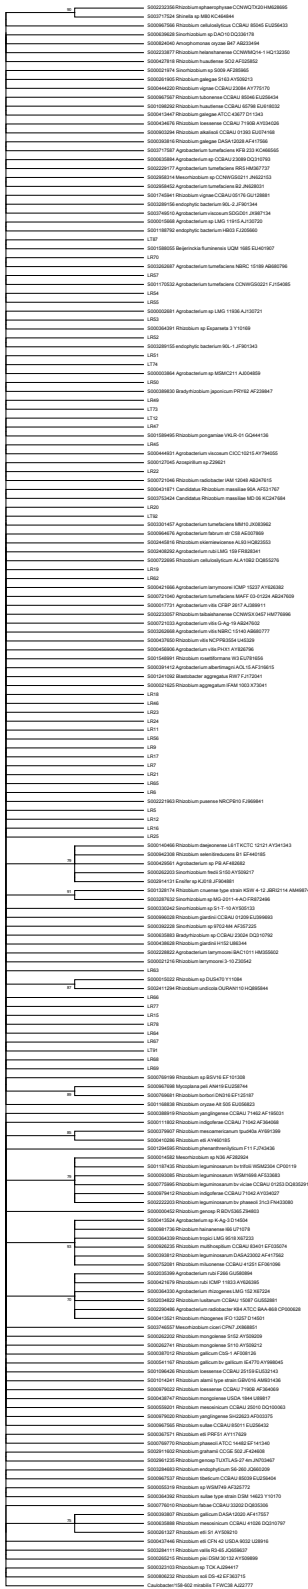

**Supplementary Figure 11.** NJ dendrogram showing the relationships among the 16S rDNA sequences of 25 isolates belonging to the genus *Pantoea* and those of reference type strains. Scale bars represent the Kimura-2 distance. Bootstrap values are indicated at the node. Nodes are collapsed at 70% probability. LS = bacteria isolated from the stem, LL = bacteria isolated from the leaves.

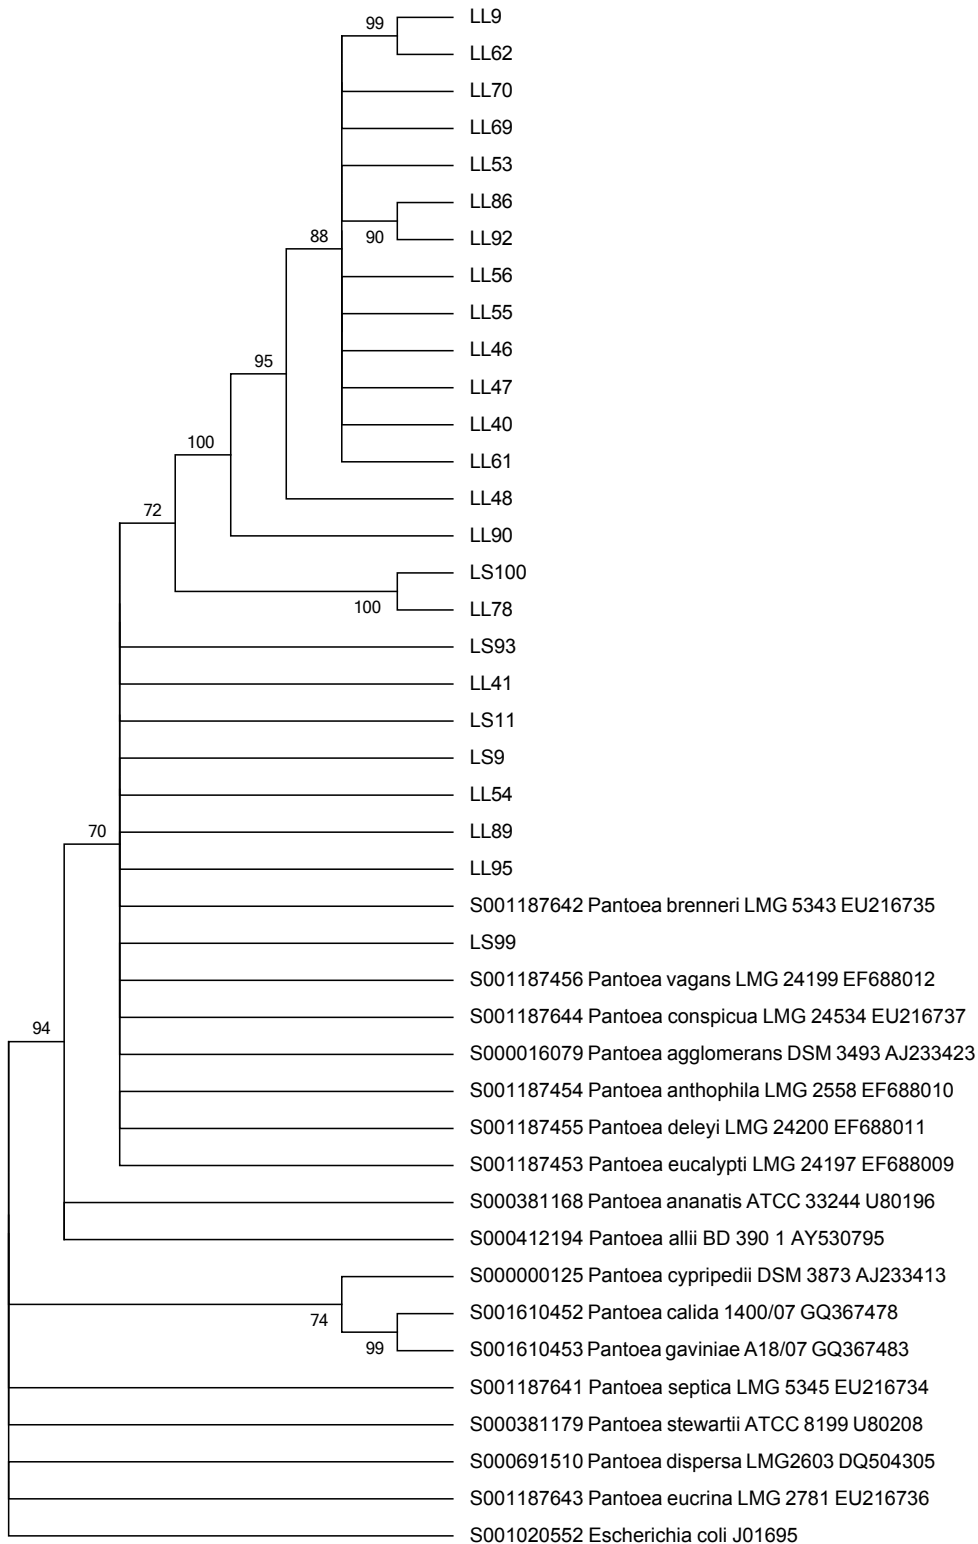

**Supplementary Figure 12.** NJ dendrogram showing the relationships among the 16S rDNA sequences of 30 isolates belonging to the genus *Microbacterium* and those of reference type strains. Scale bars represent the Kimura-2 distance. Bootstrap values are indicated at the node. Nodes are collapsed at 70% probability. LT = bacteria isolated from the rhizosphere, LS = bacteria isolated from the stem, LL = bacteria isolated from the leaves.

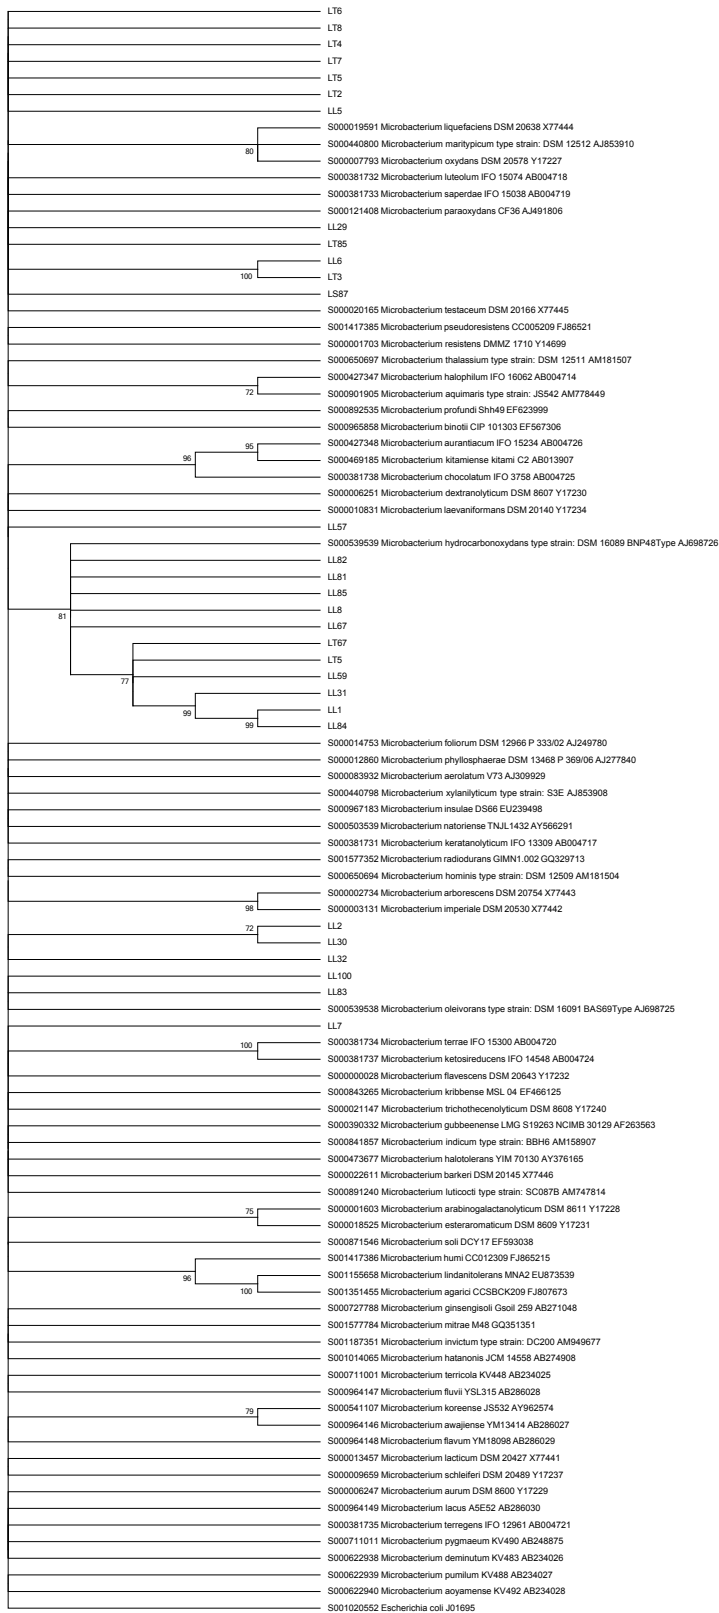

**Supplementary Figure 13.** NJ dendrogram showing the relationships among the 16S rDNA sequences of 47 isolates belonging to the genus *Bacillus* and those of reference type strains. Scale bars represent the Kimura-2 distance. Bootstrap values are indicated at the node. Nodes are collapsed at 70% probability. LT = bacteria isolated from the rhizosphere, LR = bacteria isolated from the roots, LS = bacteria isolated from the stem.

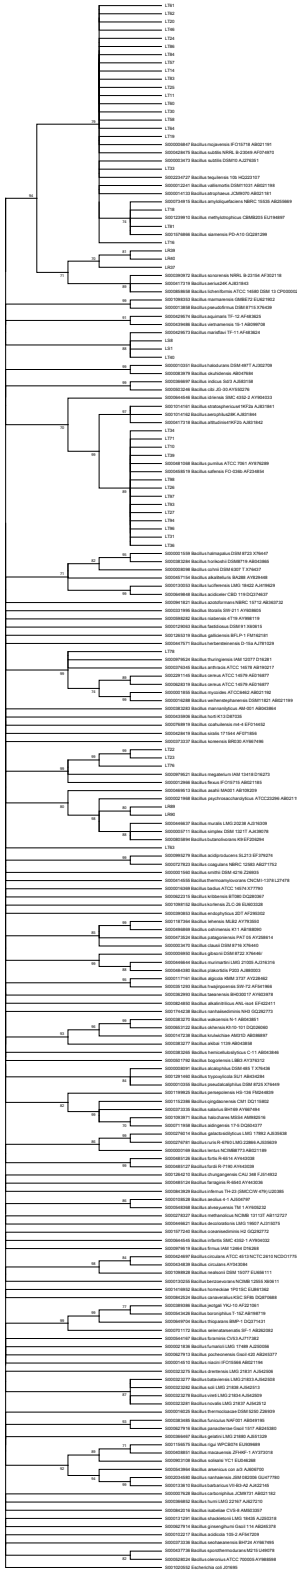

**Supplementary Figure 14.** NJ dendrogram showing the relationships among the 16S rDNA sequences of isolates belonging to the genus *Pseudomonas* and those of reference type strains. Scale bars represent the Kimura-2 distance. Bootstrap values are indicated at the node. Nodes are collapsed at 70% probability. LT= bacteria isolated from the rhizosphere, LR = bacteria isolated from the roots, LS = bacteria isolated from the stem, LL = bacteria isolated from the leaves.

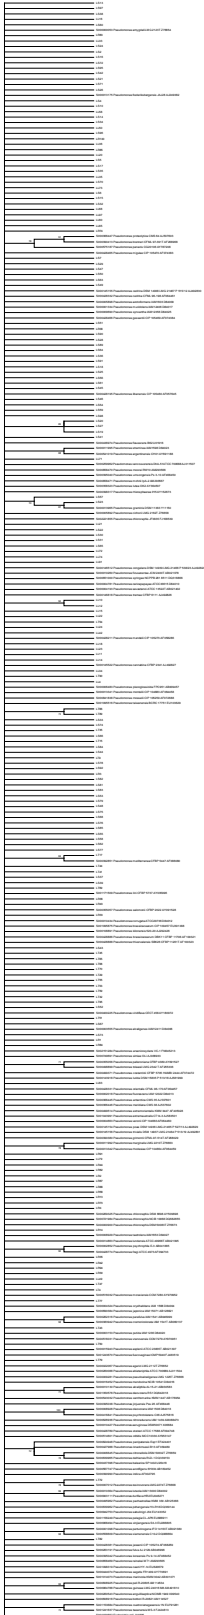

Supplementary Table 1. List of bacterial endophytic strains used in this work as tester in the cross-streak experiments.

| <b>Isolate</b> | <b>Genus</b>          | <b>Origin</b> |
|----------------|-----------------------|---------------|
| LL1            | <i>Microbacterium</i> | Leaf          |
| LL2            | <i>Microbacterium</i> | Leaf          |
| LL3            | <i>Plantibacter</i>   | Leaf          |
| LL4            | <i>Pseudomonas</i>    | Leaf          |
| LL6            | <i>Microbacterium</i> | Leaf          |
| LL7            | <i>Microbacterium</i> | Leaf          |
| LL9            | <i>Pantoea</i>        | Leaf          |
| LL10           | <i>Pseudomonas</i>    | Leaf          |
| LS1            | <i>Bacillus</i>       | Stem          |
| LS2            | <i>Pseudomonas</i>    | Stem          |
| LS3            | <i>Bacillus</i>       | Stem          |
| LS4            | <i>Pseudomonas</i>    | Stem          |
| LS5            | <i>Pseudomonas</i>    | Stem          |
| LS6            | <i>Pseudomonas</i>    | Stem          |
| LR1            | <i>Pseudomonas</i>    | Root          |
| LR2            | <i>Pseudomonas</i>    | Root          |
| LR3            | <i>Pseudomonas</i>    | Root          |
| LR4            | <i>Pseudomonas</i>    | Root          |
| LR5            | <i>Rizhobium</i>      | Root          |

Abbreviations: LL, LS, LR, strains isolated from leaf; stem, and root, respectively.

Supplementary Table 2. Number of Bcc target strains whose growth is inhibited by lavender bacterial endophytes.

| <b>Endophytic isolate</b> | <b>Genus</b>          | <b>Number of Bcc strains inhibited</b> |
|---------------------------|-----------------------|----------------------------------------|
| LL1                       | <i>Microbacterium</i> | 5                                      |
| LL2                       | <i>Microbacterium</i> | 21                                     |
| LL3                       | <i>Plantibacter</i>   | 28                                     |
| LL4                       | <i>Pseudomonas</i>    | 16                                     |
| LL6                       | <i>Microbacterium</i> | 23                                     |
| LL7                       | <i>Microbacterium</i> | 20                                     |
| LL9                       | <i>Pantoea</i>        | 35                                     |
| LL10                      | <i>Pseudomonas</i>    | 15                                     |
| LS1                       | <i>Bacillus</i>       | 21                                     |
| LS2                       | <i>Pseudomonas</i>    | 30                                     |
| LS3                       | <i>Bacillus</i>       | 12                                     |
| LS4                       | <i>Pseudomonas</i>    | 16                                     |
| LS5                       | <i>Pseudomonas</i>    | 29                                     |
| LS6                       | <i>Pseudomonas</i>    | 30                                     |
| LR1                       | <i>Pseudomonas</i>    | 10                                     |
| LR2                       | <i>Pseudomonas</i>    | 21                                     |
| LR3                       | <i>Pseudomonas</i>    | 11                                     |
| LR4                       | <i>Pseudomonas</i>    | 25                                     |
| LR5                       | <i>Rhizobium</i>      | 36                                     |

Abbreviations: LL, LS, LR: strains isolated from leaf, stem and root, respectively.



Supplementary Table 3. Sensitivity spectrum exhibited by the 40 Bcc strains in the cross streak experiment vs a panel of lavender endophytic bacterial isolates.

| N° | Species                      | Strain    | Origin | Inhibited by                                                     |
|----|------------------------------|-----------|--------|------------------------------------------------------------------|
| 1  | <i>B. cepacia (I)</i>        | FCF 1     | CF     | All tested endophytes                                            |
| 2  | <i>B. cepacia (I)</i>        | FCF 3     | CF     | All tested endophytes                                            |
| 3  | <i>B. multivorans (II)</i>   | LMG 17588 | ENV    | All tested endophytes except for LL1, LL4, LS1, LS3, LR1, LR3    |
| 4  | <i>B. cenocepacia (IIIA)</i> | FCF 16    | CF     | All tested endophytes                                            |
| 5  | <i>B. cenocepacia (IIIA)</i> | J2315     | CF     | All tested endophytes except for LL1, LS3,                       |
| 6  | <i>B. cenocepacia (IIB)</i>  | FCF 18    | CF     | All tested endophytes except for LL1                             |
| 7  | <i>B. cenocepacia (IIB)</i>  | FCF 20    | CF     | Partially by LS1, LS2, LS3, LS5, LR1                             |
| 8  | <i>B. cenocepacia (IIB)</i>  | FCF 23    | CF     | All tested endophytes except for LL1, LS3, LR1                   |
| 9  | <i>B. cenocepacia (IIB)</i>  | FCF 24    | CF     | All tested endophytes except for LL1, LR1                        |
| 10 | <i>B. cenocepacia (IIB)</i>  | FCF 27    | CF     | All tested endophytes except for LL1                             |
| 11 | <i>B. cenocepacia (IIB)</i>  | FCF 29    | CF     | All tested endophytes except for LL1, LR1, LR3                   |
| 12 | <i>B. cenocepacia (IIB)</i>  | FCF 30    | CF     | All tested endophytes except for LL1, LR1, LR3                   |
| 13 | <i>B. cenocepacia (IIB)</i>  | LMG 16654 | CF     | LL2, LL3, LL6, LL9, LS2, LS5, LS6, LR2, LR4, LR5                 |
| 14 | <i>B. cenocepacia (IIB)</i>  | C5424     | CF     | LL3, LL6, LL7, LL9, LS1, LS2, LS4, LS5, LS6                      |
| 15 | <i>B. cenocepacia (IIB)</i>  | CEP511    | CF     | LL2, LL3, LL6, LL7, LL9, LS2, LS5, LS6                           |
| 16 | <i>B. cenocepacia (IIB)</i>  | MVPC 1/16 | ENV    | LL3, LL9, LS4, LS6, LR2, LR4                                     |
| 17 | <i>B. cenocepacia (IIB)</i>  | MVPC 1/73 | ENV    | LL3, LL9, LR5                                                    |
| 18 | <i>B. cenocepacia (IIIC)</i> | LMG 19230 | ENV    | LL9, LR5                                                         |
| 19 | <i>B. cenocepacia (IIIC)</i> | LMG 19240 | ENV    | LL6, LL9, LS2, LS6, LR5                                          |
| 20 | <i>B. cenocepacia (IIID)</i> | FCF 38    | CF     | All tested endophytes except for LL1                             |
| 21 | <i>B. cenocepacia (IIID)</i> | LMG 21462 | CF     | All tested endophytes                                            |
| 22 | <i>B. stabilis (IV)</i>      | FCF 41    | CF     | LL9, LS3, LS6, LR5                                               |
| 23 | <i>B. vietnamiensis (V)</i>  | FCF 42    | CF     | All tested endophytes                                            |
| 24 | <i>B. vietnamiensis (V)</i>  | TVV 75    | ENV    | LL3, LL6, LL7, LL9, LS1, LS2, LS5, LS6, LR2, LR4, LR5            |
| 25 | <i>B. dolosa (VI)</i>        | LMG 18941 | CF     | LL2, LL3, LL9, LS1, LS2, LS5, LS6, LR4, LR5                      |
| 26 | <i>B. dolosa (VI)</i>        | LMG 18942 | CF     | LL3, LL9, LS5, LS6, LR5                                          |
| 27 | <i>B. dolosa (VI)</i>        | LMG 18943 | CF     | LL3, LL9, LS2, LS5, LS6, LR4, LR5                                |
| 28 | <i>B. ambifaria (VII)</i>    | MCI 7     | ENV    | LL3, LL9, LS2, LS5, LS6, LR2, LR4, LR5                           |
| 29 | <i>B. ambifaria (VII)</i>    | LMG 19467 | CF     | LL3, LL7, LL9, LS2, LS5, LS6, LR2, LR4, LR5                      |
| 30 | <i>B. ambifaria (VII)</i>    | LMG 19182 | ENV    | LL3, LL7, LL9, LS1, LS2, LS4, LS5, LS6, LR2, LR4, LR5            |
| 31 | <i>B. anthina (VIII)</i>     | LMG 16670 | ENV    | LL2, LL3, LL4, LL6, LL9, LS1, LS2, LS5, LS6, LR2, LR4, LR5       |
| 32 | <i>B. pyrrocinia (IX)</i>    | FCF 43    | CF     | LL2, LL3, LL4, LL6, LL7, LL9, LL10, LS1, LS2, LS5, LS6, LR4, LR5 |
| 33 | <i>B. lata</i>               | LSED 4    | CF     | LL2, LL4, LL6, LL9, LS1, LS2, LS5, LS6, LRA, LR5                 |
| 34 | <i>B. latens</i>             | LMG 24064 | CF     | LL2, LL6, LL9, LS2, LS5, LR5                                     |
| 35 | <i>B. diffusa</i>            | LMG 24065 | CF     | LL9, LS2, LS5, LR5                                               |
| 36 | <i>B. contaminans</i>        | LMG 23361 | AI     | LL9, LR5                                                         |
| 37 | <i>B. seminalis</i>          | LMG 24067 | CF     | LR5                                                              |
| 38 | <i>B. metallica</i>          | LMG 24068 | CF     | LR5                                                              |
| 39 | <i>B. arboris</i>            | LMG 24066 | ENV    | LR5                                                              |
| 40 | <i>B. ubonensis</i>          | LMG 24263 | NI     | LR5                                                              |

Abbreviations: CF, strains isolated from Cystic Fibrosis patients; AI, strains isolated from Animal Infection; NI, strains isolated from Nosocomial Infection; ENV, environmental strain; LL, LS, LR: strains isolated from leaf, stem, and root, respectively.

Supplementary Table 4. Length of aligned matrices (bp), Variable and conserved characters number, Parsimony-informative characters, Consistency Index (CI), Retention Index (RI) and species used as outgroup of dendrograms obtained with Maximum Parsimony (see Materials and Methods for details).

| <b>Dendrogram</b>       | <b>Aligned matrix length (bp)</b> | <b>Conserved characters</b> | <b>Variable characters</b> | <b>Parsimony informative characters</b> | <b>Retention Index</b> | <b>Consistency Index</b> | <b>Species used as outgroup</b> |
|-------------------------|-----------------------------------|-----------------------------|----------------------------|-----------------------------------------|------------------------|--------------------------|---------------------------------|
| <i>Pantoea</i>          | 545                               | 344                         | 201                        | 161                                     | 0.9487                 | 0.6383                   | <i>E. coli</i>                  |
| <i>Pseudomonas</i>      | 610                               | 175                         | 423                        | 210                                     | 0.9717                 | 0.4434                   | <i>E. coli</i>                  |
| <i>Bacillus</i>         | 619                               | 281                         | 327                        | 227                                     | 0.9241                 | 0.1904                   | <i>E. coli</i>                  |
| <i>Rhizobium</i>        | 458                               | 296                         | 152                        | 75                                      | 0.9593                 | 0.4379                   | <i>C. mirabilis</i>             |
| <i>Stenotrophomonas</i> | 524                               | 314                         | 192                        | 89                                      | 0.9707                 | 0.6874                   | <i>E. coli</i>                  |
| <i>Microbacterium</i>   | 566                               | 337                         | 199                        | 111                                     | 0.9522                 | 0.3379                   | <i>E. coli</i>                  |
